# Supplementary material for: The interaction of H2O2 with TiAlPO-5 molecular sieves: probing the catalytic potential of framework substituted Ti ions
Source: Royal Society of Chemistry journal article supplement (doi:10.1039/c3cp51214b), 2013-01-01
Supplement: c3cp51214b.pdf [file c3cp51214b.pdf]

## SUPPORTING INFORMATION

### The Interaction of H<sub>2</sub>O<sub>2</sub> with TiAlPO-5 Molecular Sieves. Probing the Catalytic Potential of Framework Substituted Ti Ions.

Chiara Novara<sup>a)</sup>, Almudena Alfayate<sup>b)</sup>, Gloria Berlier<sup>a)</sup>, Sara Maurelli<sup>a)</sup>, Mario Chiesa<sup>a)\*</sup>.

*a) Dipartimento di Chimica, Università di Torino and NIS Centre of Excellence, Via Giuria 7, 10125-Torino, Italy*

*b) Instituto de Catálisis y Petroleoquímica, ICP-CSIC, C/ Marie Curie 2, 28049 Madrid, Spain*

#### S1 UV-Vis spectra of calcined TiAlPO-5 reacted with aqueous H<sub>2</sub>O<sub>2</sub>.

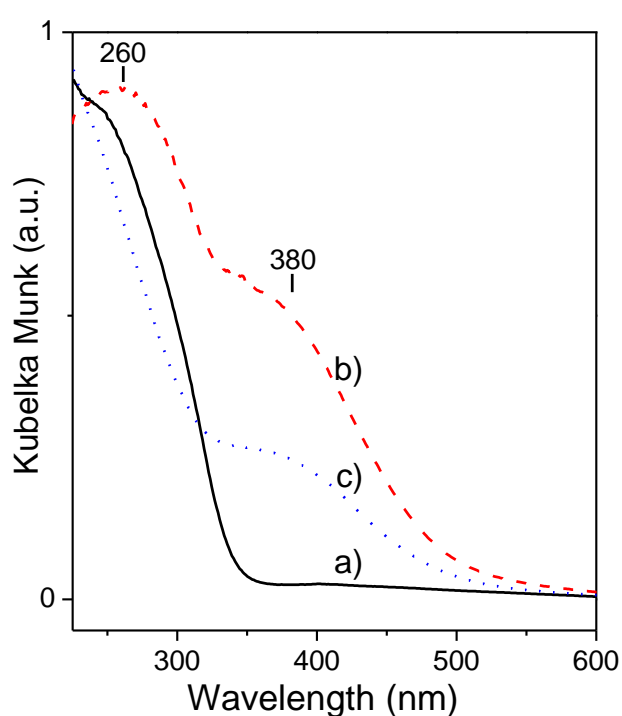

**Figure S1.** DR UV-Vis spectra of a) Calcined TiAlPO-5, b) in contact with aqueous H<sub>2</sub>O<sub>2</sub> and c) after room temperature outgassing. Spectra were arbitrarily normalized for easier comparison.

## S2. Experimental ENDOR Spectra

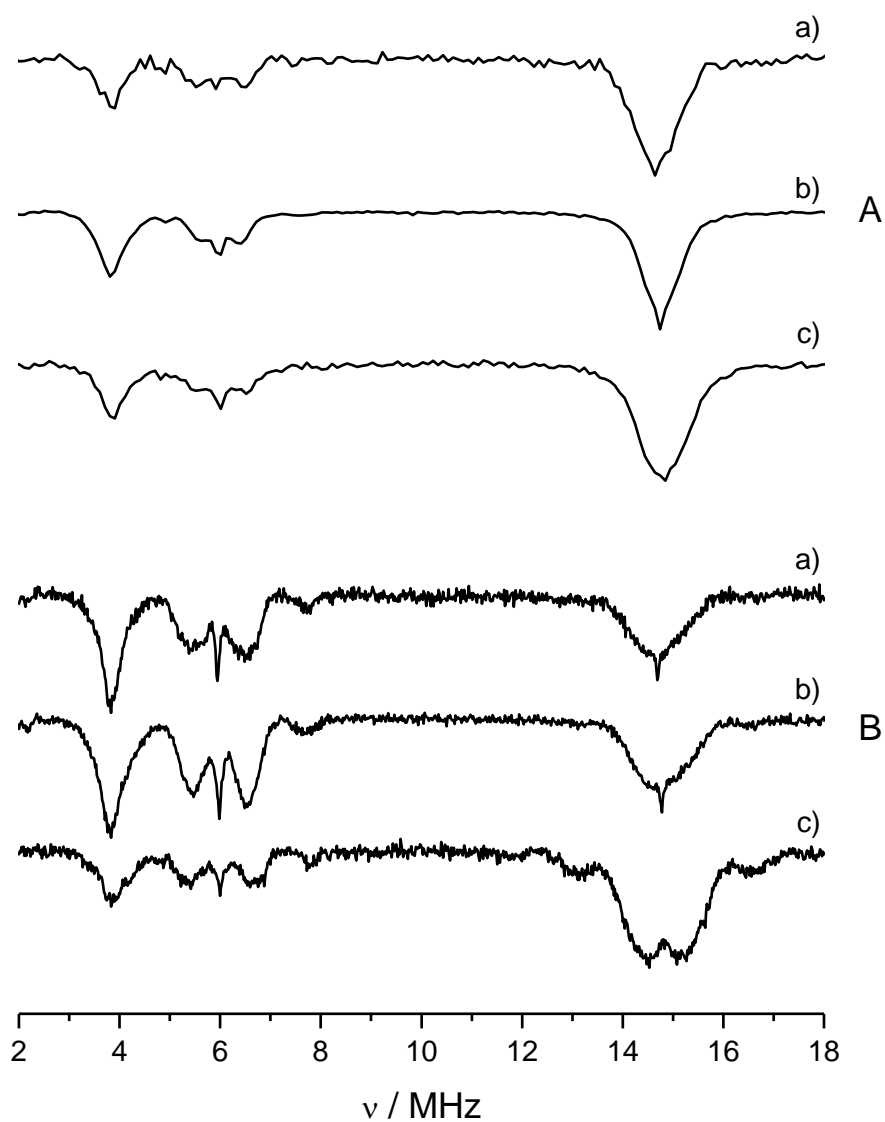

**Figure S2.** Experimental Mims ENDOR spectra of  $\text{O}_2^-$  on TiAlPO-5 obtained by reaction of the calcined sample with A) hydrated  $\text{H}_2\text{O}_2$  and B) anhydrous  $\text{H}_2\text{O}_2$  (from UHP). The spectra are taken at three different magnetic field settings corresponding to a)  $g_{zz}$  component ( $B_0 = 344.4$  mT), b)  $g_{yy}$  component ( $B_0 = 346.6$  mT) and c)  $g_{xx}$  component ( $B_0 = 348.3$  mT).

### S3. Computer simulations of $^{31}\text{P}$ ENDOR spectra of TiAlPO-5 obtained by reaction with anhydrous $\text{H}_2\text{O}_2$ (from UHP)

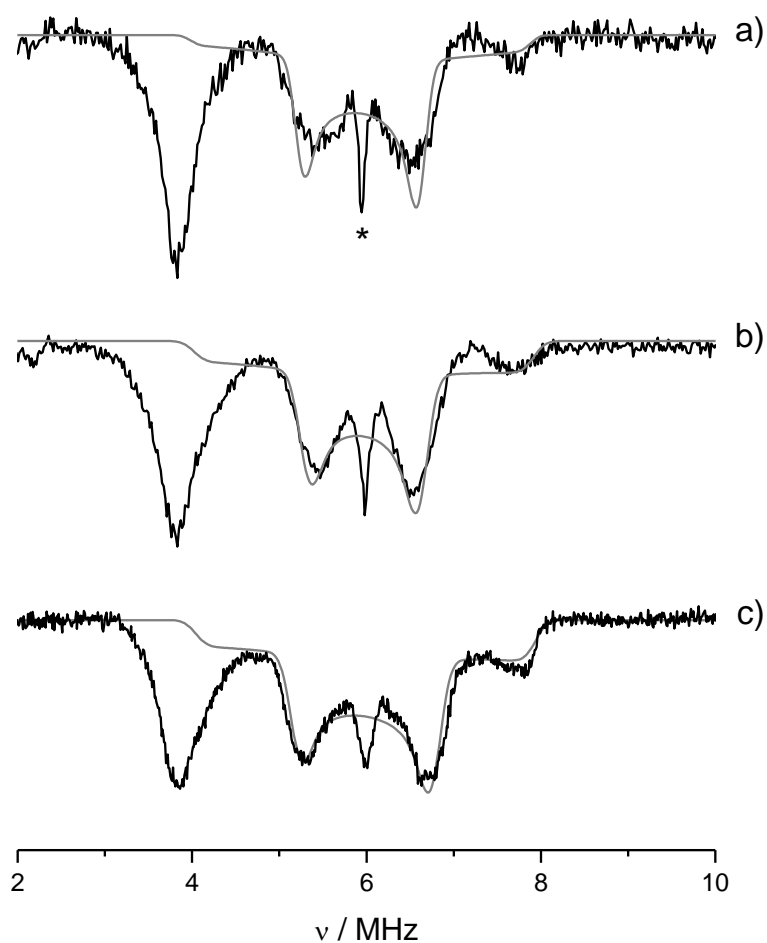

**Figure S3.** Experimental (black line) and simulated (grey line)  $^{31}\text{P}$  Mims ENDOR spectra of  $\text{O}_2^-$  on TiAlPO-5 obtained by reaction of the calcined sample with anhydrous  $\text{H}_2\text{O}_2$  (from UHP) measured at three different magnetic field settings corresponding to a)  $g_{zz}$  component ( $B_0 = 344.4$  mT), b)  $g_{yy}$  component ( $B_0 = 346.6$  mT) and c)  $g_{xx}$  component ( $B_0 = 347.7$  mT). The asterisk indicates the  $^{31}\text{P}$  signal belonging to the remote phosphorous nuclei, which are not taken into account in the simulation. The simulated parameters are listed in Table 1 in the main text.
